# Supplementary material
Source: publisher figshare collection journal article supplement (https://tandf.figshare.com/ndownloader/files/18246818)
Supplement: Supplementary file 1 [file 18246818]

Axel Mayer, Johannes Zimmermann, Jürgen Hoyer, Simone Salzer, Jörg Wiltink, Eric Leibling & Falk Leichsenring (2019) Interindividual Differences in Treatment Effects Based on Structural Equation Models with Latent Variables: An EffectLiteR Tutorial, Structural Equation Modeling: A Multidisciplinary Journal, DOI: 10.1080/10705511.2019.1671196

## Supplemental Materials

### Appendix A: Software Code

```
library(EffectLiteR) ## version number: 0.4-4
# d <- elrReadData("C:/PrivateData/Sophonet/sophonet_data_complete.rds") # real data
d <- sophonet_data_simulated # simulated data included in EffectLiteR

covs <- c("comorbid", "iip.lov", "iip.dom", "lsas.lt1", "bdi.lt1", "ecr.anx.lt1",
          "ecr.avoi.lt1", "hal", "tosca.shame.t1", "fskn.se.t1")
indicators <- list("lsas.lt2" = c("lsas.a.t2", "lsas.v.t2"),
                  "lsas.lt1" = c("lsas.a.t1", "lsas.v.t1"),
                  "bdi.lt1" = c("bdi.t1.i1", "bdi.t1.i2", "bdi.t1.i3"),
                  "ecr.anx.lt1" = c("ecr.anx.t1.i1", "ecr.anx.t1.i2", "ecr.anx.t1.i3"),
                  "ecr.avoi.lt1" = c("ecr.avoi.t1.i1", "ecr.avoi.t1.i2", "ecr.avoi.t1.i3"),
                  "hal" = c("tpq.ha.i1", "tpq.ha.i2", "tpq.ha.i3"),
                  "tosca.shame.t1" = c("tosca.shame.t1.i1", "tosca.shame.t1.i2"),
                  "fskn.se.t1" = c("fskn.se.t1.i1", "fskn.se.t1.i2"))

mm <- generateMeasurementModel(indicators=indicators, ncells=2)

model <- effectLite(y = "lsas.lt2", x = "tb", z = covs,
                   control = "CBT", data = d, missing = "fiml",
                   measurement = mm, homoscedasticity = FALSE)

model

## model with correction for multilevel structure (only works with real data)
# model2 <- effectLite(y = "lsas.lt2", x = "tb", z = covs,
#                      # control = "CBT", data = d, missing = "listwise",
#                      # measurement = mm, homoscedasticity = FALSE,
#                      # ids=~therap, fixed.cell=TRUE)
# model2
```

**Appendix B: Options in effectLite()**

|                  |                                                                                                                                                                                                                                                                                                                                                                                                    |
|------------------|----------------------------------------------------------------------------------------------------------------------------------------------------------------------------------------------------------------------------------------------------------------------------------------------------------------------------------------------------------------------------------------------------|
| y                | Dependent variable (character string). Can be the name of a manifest variable or of a latent variable.                                                                                                                                                                                                                                                                                             |
| x                | Treatment variable (character string) treated as categorical variable.                                                                                                                                                                                                                                                                                                                             |
| k                | Vector of manifest variables treated as categorical covariates (character vector).                                                                                                                                                                                                                                                                                                                 |
| z                | Vector of continuous covariates (character vector). Names of both manifest and latent variables are allowed.                                                                                                                                                                                                                                                                                       |
| data             | A data frame.                                                                                                                                                                                                                                                                                                                                                                                      |
| method           | Can be one of c("sem", "lm") and indicates which function is used to fit the model.                                                                                                                                                                                                                                                                                                                |
| control          | Value of x that is used as control group. If "default", takes the first entry of as.factor(x).                                                                                                                                                                                                                                                                                                     |
| measurement      | Measurement model. The measurement model is lavaan syntax (character string), that will be appended before the automatically generated lavaan input. It can be used to specify a measurement for a latent outcome variable and/or latent covariates. See also the example and <a href="#">generateMeasurementModel</a> .                                                                           |
| fixed.cell       | logical. If FALSE (default), the group sizes are treated as stochastic rather than fixed.                                                                                                                                                                                                                                                                                                          |
| fixed.z          | logical. If FALSE (default), the continuous covariates are treated as stochastic rather than fixed.                                                                                                                                                                                                                                                                                                |
| missing          | Missing data handling. Will be passed on to sem or ignored for method="lm".                                                                                                                                                                                                                                                                                                                        |
| se               | Type of standard errors. Will be passed on to sem or ignored for method="lm".                                                                                                                                                                                                                                                                                                                      |
| syntax.only      | logical. If TRUE, only syntax is returned and the model will not be estimated.                                                                                                                                                                                                                                                                                                                     |
| interactions     | character. Indicates the type of interaction. Can be one of "all (all interactions)", "2-way" (only two-way interactions), "X:K,X:Z" (only X:K and X:Z interactions), "X:K" (only X:K interactions), "X:Z" (only X:Z interactions), "none" (no treatment by covariate interactions, but potentially interactions between categorical and continuous covariates), or "no" (no interactions at all). |
| homoscedasticity | logical. If TRUE, residual variances of the dependent variable are assumed to be homogeneous across cells.                                                                                                                                                                                                                                                                                         |
| test.stat        | character. Can be one of c("default", "Chisq", "Ftest") and indicates the statistic used for the hypothesis tests. The tests are either based on the large sample Chi-Squared statistic (Wald tests) or the finite sample F statistic with approximate F distribution. The default setting for method="sem" is "Chisq" and the default setting for method="lm" is "Ftest".                         |
| propscore        | Vector of covariates (character vector) that will be used to compute (multiple) propensity scores based on a multinomial regression without interactions. Alternatively, the user can specify a formula with the treatment variable as dependent variable for more control over the propensity score model.                                                                                        |
| ids              | Formula specifying cluster ID variables. Will be passed on to <a href="#">lavaan.survey</a> . See svydesign for details.                                                                                                                                                                                                                                                                           |

|         |                                                                                                                                                                                                                                                                                                                                               |
|---------|-----------------------------------------------------------------------------------------------------------------------------------------------------------------------------------------------------------------------------------------------------------------------------------------------------------------------------------------------|
| weights | Formula to specify sampling weights. Currently only one weight variable is supported. Will be passed on to <a href="#">lavaan.survey</a> . See <code>svydesign</code> for details. Note: Only use weights if you know what you are doing. For example, some conditional treatment effects may require different weights than average effects. |
| add     | Character string that will be pasted at the end of the generated lavaan syntax. Can for example be used to add additional (in-) equality constraints or to compute user-defined conditional effects.                                                                                                                                          |
| ...     | Further arguments passed to <a href="#">sem</a> .                                                                                                                                                                                                                                                                                             |
